# Supplementary material for: Possible realization of the high-temperature and multichannel quantum anomalous Hall effect in graphene/CrBr3 heterostructures under pressure
Source: Royal Society of Chemistry journal article supplement (doi:10.1039/c9cp03219c), 2019-01-01
Supplement: c9cp03219c1.pdf [file c9cp03219c1.pdf]

Supplemental Material

## **Possible realization of high-temperature and multichannel quantum anomalous Hall effect in graphene/CrBr<sub>3</sub> heterostructures under pressure**

Huisheng Zhang,<sup>\*a,b</sup> Yaohui Ning,<sup>a</sup> Wenjia Yang,<sup>a</sup> Jiayong Zhang,<sup>c,b</sup> Ruiqiang Zhang<sup>a</sup>  
and Xiaohong Xu<sup>\*a</sup>

<sup>a</sup>*Key Laboratory of Magnetic Molecules and Magnetic Information Materials of the Ministry of Education, Research Institute of Materials Science, and College of Physics and Information Engineering, Shanxi Normal University, Linfen 041004, China. Email: hszhang@sxnu.edu.cn, xuxh@sxnu.edu.cn*

<sup>b</sup>*State Key Laboratory of Surface Physics and Department of Physics, Fudan University, Shanghai 200433, China.*

<sup>c</sup>*Ψ<sub>usts</sub> Institute, Jiangsu Key Laboratory of Micro and Nano Heat Fluid Flow Technology and Energy Application, School of Mathematics and Physics, Suzhou University of Science and Technology, Suzhou, Jiangsu 215009, China.*

### **Supporting Note I: three typical configurations of Gr/CrBr<sub>3</sub> heterobilayers**

Here, we mainly considered three typical configurations of Gr/CrBr<sub>3</sub> heterobilayers, as displayed in Fig. S1. Fig. S1(d) gives the corresponding total energies of configurations (a)-(c) (denoted as (I)-(III), respectively). Due to configuration (I) harboring the lowest energies, this configuration is adopted for calculations in the main text. Our calculations show that the average inter-layer distances are  $\sim 3.5$  Å for all of the three heterobilayers, indicating the interfacial coupling between graphene and CrBr<sub>3</sub> monolayer indeed belongs to vdW interaction.

### **Supporting Note II: band structures and topological properties of the other two configurations**

The band structures of configurations (II) and (III) under the pressure of  $\sim 6.5$  GPa (the layer distance is  $\sim 2.7$  Å) are shown in Fig. S6. Obviously, Dirac cones of graphene are also spin-polarized (see Fig. S6 (a) and (e)). When SOC is considered, a

band gap opens at either the K and K' points, as illustrated in Fig. S6(b) and (f). Fig. S6(c,d) and (g,h) zoom in on the band structures of Fig. S6(b) and (f) near the K and K' points, respectively. The global band gaps with 10.6 and 8.7 meV locate near  $E_F$  for configurations (I) and (II), respectively. The Berry curvatures calculations (see Fig. S7) demonstrate that the SOC-induced band gaps for configurations (II) and (III) are topological nontrivial. By integrating the Berry curvatures, a nonzero Chern number of  $C = -2$  is obtained for each of configuration (II) and (III), corresponding to the quantized Hall conductance of  $\sigma_{xy} = -2e^2/h$ . All those suggest that Gr/CrBr<sub>3</sub> heterobilayer can be converted into a QAHE system under pressure.

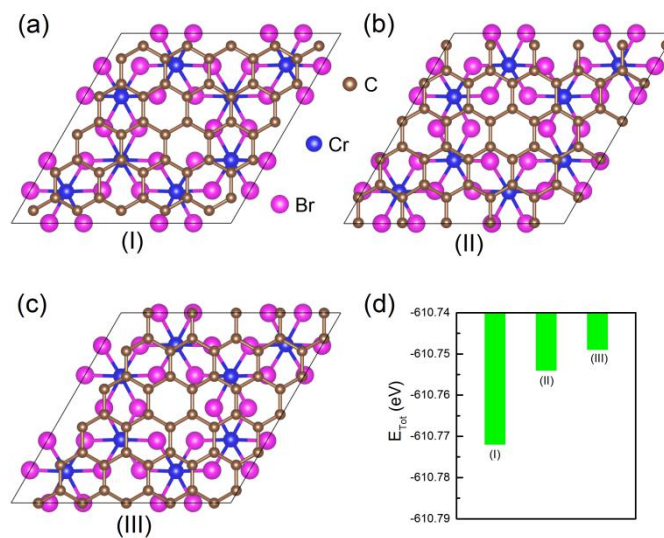

**Fig. S1** (a)-(c) Top views of three typical configurations of Gr/CrBr<sub>3</sub>, denoted as (I)-(III). (d) The corresponding total energies of configurations (I)-(III), respectively. The configuration (I) is adopted for calculations in the main text.

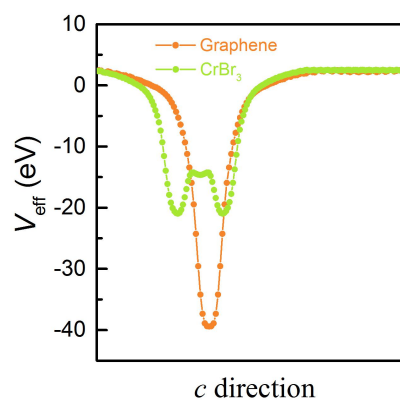

**Fig. S2** The electrostatic potential  $V_{\text{eff}}$  of monolayer  $\text{CrBr}_3$  (green dotted line) and graphene (yellow dotted line). The vacuum level  $E_{\text{vac}}$  of  $\text{CrBr}_3$  and graphene are 2.90 eV and 2.54 eV. The calculated  $E_{\text{F}}$  of  $\text{CrBr}_3$  and graphene are -1.72 eV and -3.94 eV without SOC, respectively.

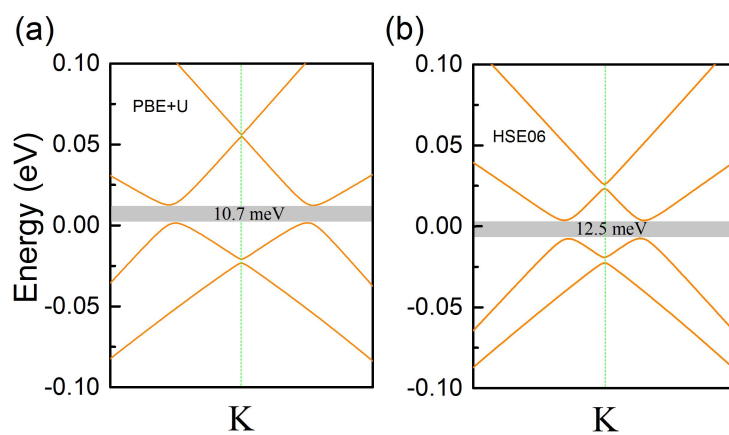

**Fig. S3** Calculated band structures of Gr/CrBr<sub>3</sub> heterobilayer at a pressure of 6.5 GPa by using PBE+U (a) and HSE06 (b) functionals.

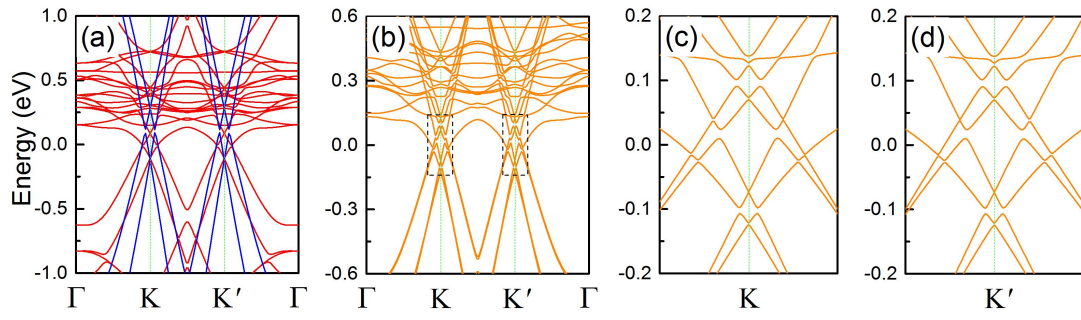

**Fig. S4** Band structures of Gr/CrBr<sub>3</sub>/Gr sandwiched heterostructure without (a) and with (b) SOC at a pressure of 4.8 GPa, with the red and blue lines representing the spin-up and spin-down bands, respectively. (c) and (d) are the zoom-in views of K and K' points near  $E_F$  in (b).

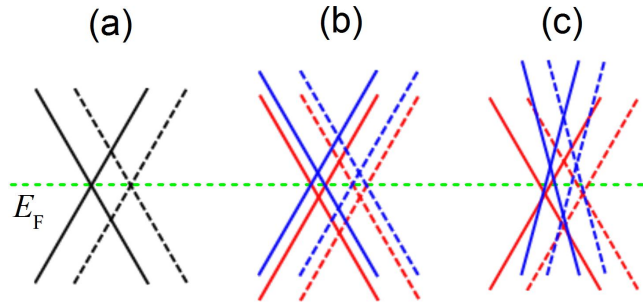

**Fig. S5** The schematic band evolution of Gr/CrBr<sub>3</sub>/Gr system. (a) Two Dirac cones coexist at the K (K') point in the heterostructure. (b) two Dirac cones split into two pairs of spin-up (red colors) and spin-down (blue colors) Dirac cones when magnetism is introduced. (c) pressure-induced the shift of the spin-down Dirac cones, where cross points of spin-up and spin-down bands do not locate on a line. Here, the solid and dashed lines represent the Dirac cones of top and bottom layer of graphene in Gr/CrBr<sub>3</sub>/Gr system. The green dashed line denotes Fermi level ( $E_F$ ).

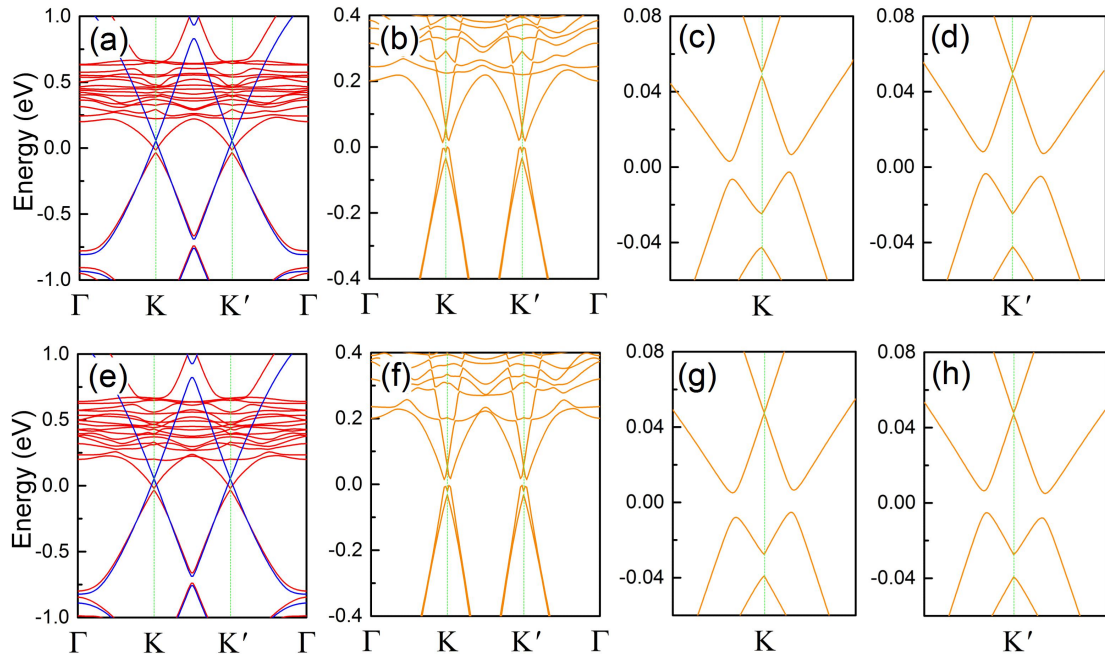

**Fig. S6** Band structures of configurations (II) (a)-(d) and (III) (e)-(h) of Gr/CrBr<sub>3</sub> heterobilayers (Fig. S1) under pressure, respectively. (a),(b) and (e),(f) denote the band structures without and with SOC. The red and blue lines represent the spin-up and spin-down bands. (c),(d) and (g),(h) are the zoom-in views of K and K' points near  $E_F$  in (b) and (f).



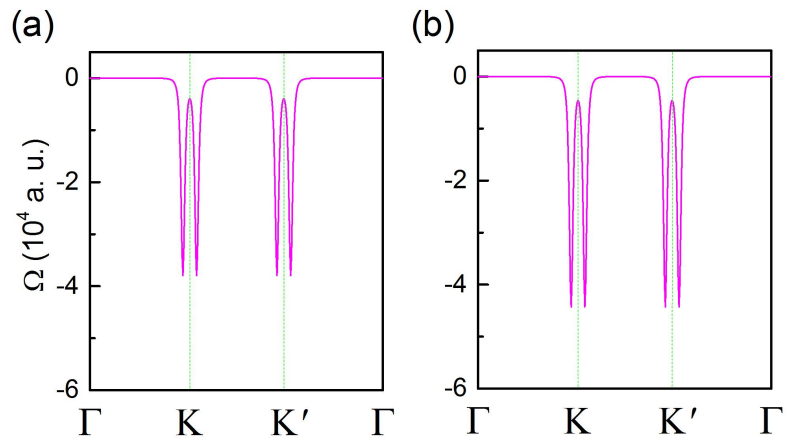

**Fig. S7** Corresponding Berry curvatures of configurations (II) (a) and (III) (b) in Fig. S1, respectively.
